# Supplementary material for: Investigation of the role of lignin in biphasic xylan hydrolysis during dilute acid and organosolv pretreatment of corn stover
Source: Royal Society of Chemistry journal article supplement (doi:10.1039/c4gc02258k), 2014-12-02

Figure S1. pH vs. time for pretreatment hydrolyzates of corn stover (◆), isolated xylan (▲) pretreated under dilute acid and corn stover pretreated under organosolv conditions (■)

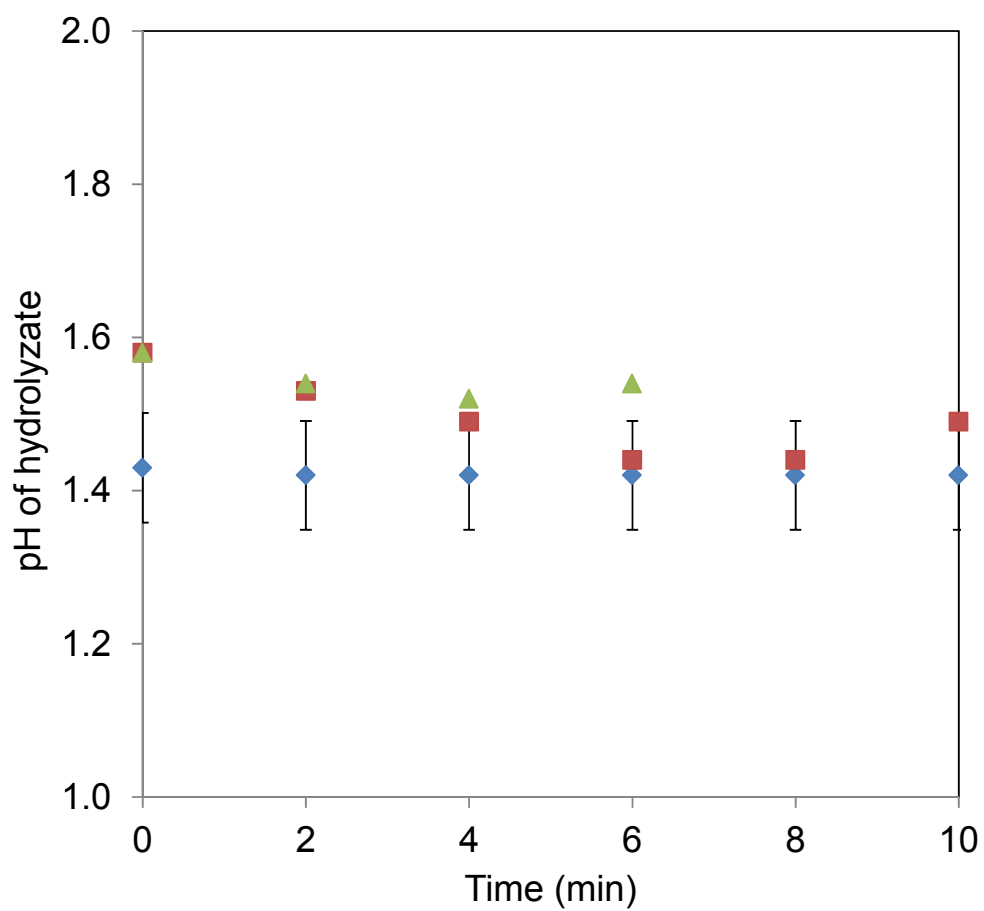

Figure S2. Xylose yields (a) and 1<sup>st</sup> order kinetics for xylan hydrolysis during dilute acid pretreatment of xylan isolated from CSR (b)

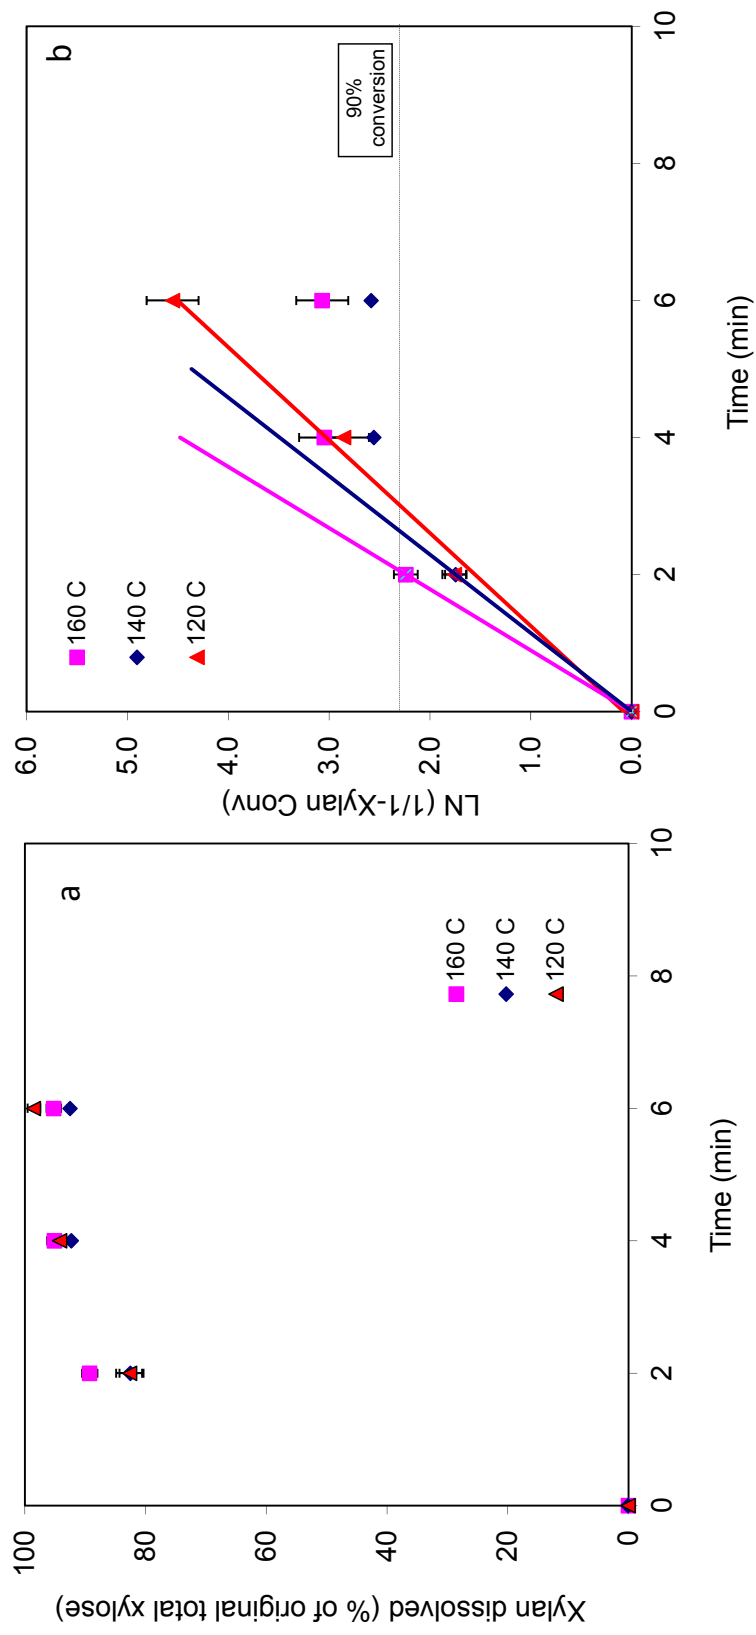

Supplement: c4gc02258k1.pdf [file c4gc02258k1.pdf]
